# Supplementary material for: Dihydroartemisinin imposes positive and negative regulation on Treg and plasma cells via direct interaction and activation of c-Fos
Source: PubMed Central journal article supplement (PMC9842609; doi:10.1038/s42003-023-04454-5), 2023-01-16
Supplement: 42003_2023_4454_MOESM2_ESM.pdf [file 42003_2023_4454_MOESM2_ESM.pdf]

## Supplementary Information

### **Dihydroartemisinin imposes positive and negative regulation on T<sub>reg</sub> and plasma cells via direct interaction and activation of c-Fos**

**Authors:** Qilong Li<sup>1,2#</sup>, Ning Jiang<sup>1,2#</sup>, Yiwei Zhang<sup>1,2</sup>, Yize Liu<sup>1,2</sup>, Ziwei Su<sup>1,2</sup>, Quan Yuan<sup>1,2</sup>, Xiaoyu Sang<sup>1,2</sup>, Ran Chen<sup>1,2</sup>, Ying Feng<sup>1,2</sup>, Qijun Chen<sup>1,2\*</sup>

#### **Affiliations**

<sup>1</sup>Key Laboratory of Livestock Infectious Diseases, Ministry of Education, Key Laboratory of Zoonosis, College of Animal Science and Veterinary Medicine, Shenyang Agricultural University, 120 Dongling Road, Shenyang 110866, China

<sup>2</sup>Research Unit for Pathogenic Mechanisms of Zoonotic Parasites, Chinese Academy of Medical Sciences, 120 Dongling Road, Shenyang 110866, China

# These authors contributed equally.

\* Corresponding author. Email: [qijunchen759@syau.edu.cn](mailto:qijunchen759@syau.edu.cn).

**Table of Contents:**

**Supplementary Figures: 7**

**Supplementary Data: 3**

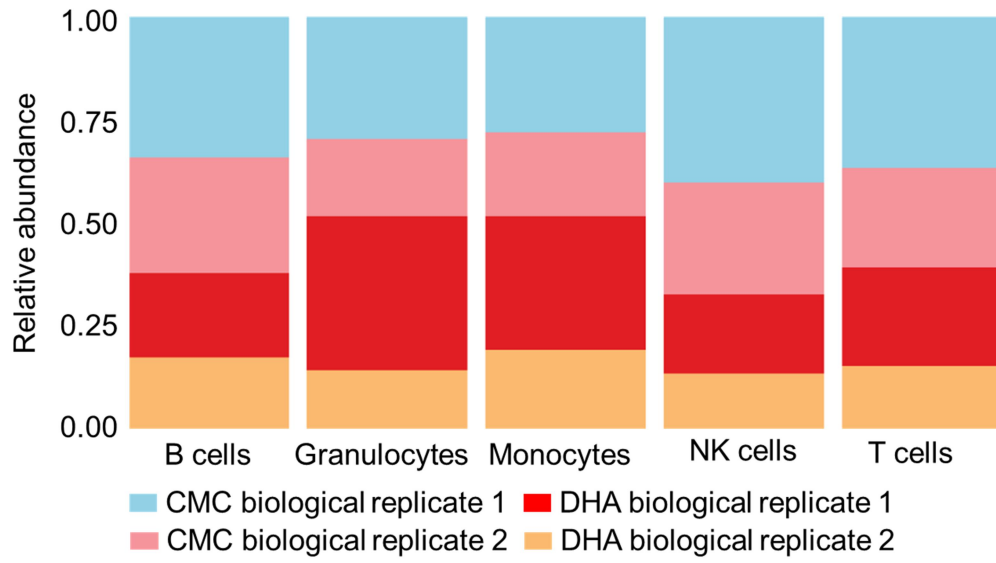

**Supplementary Figure 1.** The relative proportions of cell types within each cluster are examined using the stacked barplots.

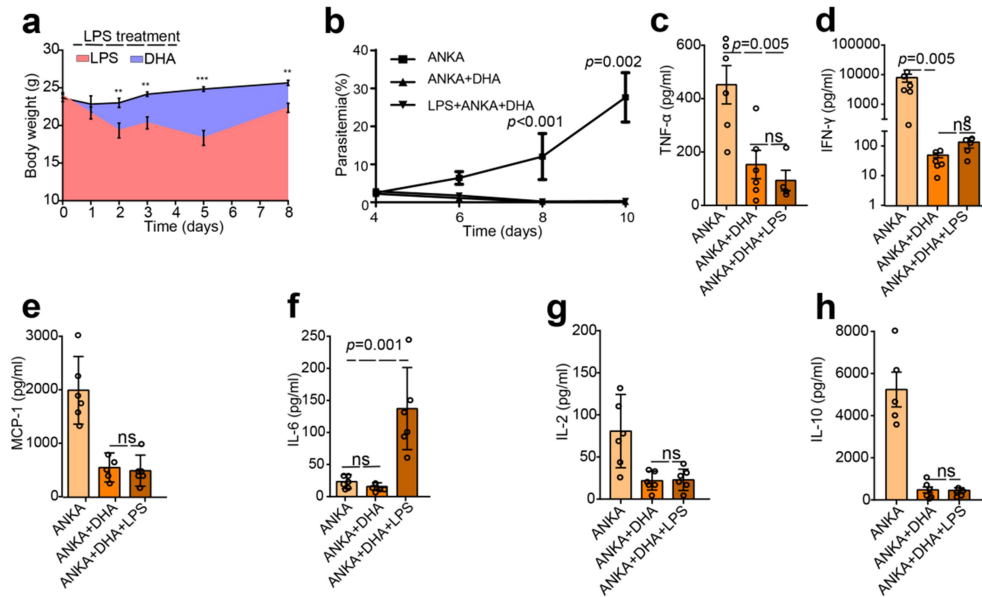

**Supplementary Figure 2.** (a) Changes in the body weights of mice treated with LPS (red line,  $n = 7$ ) and mice treated with LPS plus DHA (blue line,  $n = 7$ ). (b) Most parasites have been cleared upon DHA treatment ( $n = 5$ , Student t-test). (c-h) Serum abundance of IFN- $\gamma$ , tumor necrosis factor  $\alpha$  (TNF $\alpha$ ), IL-2, MCP-1, IL-6 and IL-10 increased in *P. berghei* ANKA-infected mice compared with DHA-treated ANKA-infected or LPS- injected mice ( $n=4-6$ , Student t-test). The sera were collected at day 7 after DHA treatment and the levels of the cytokines were determined by cytometric bead array (CBA). The error bars indicate standard error.

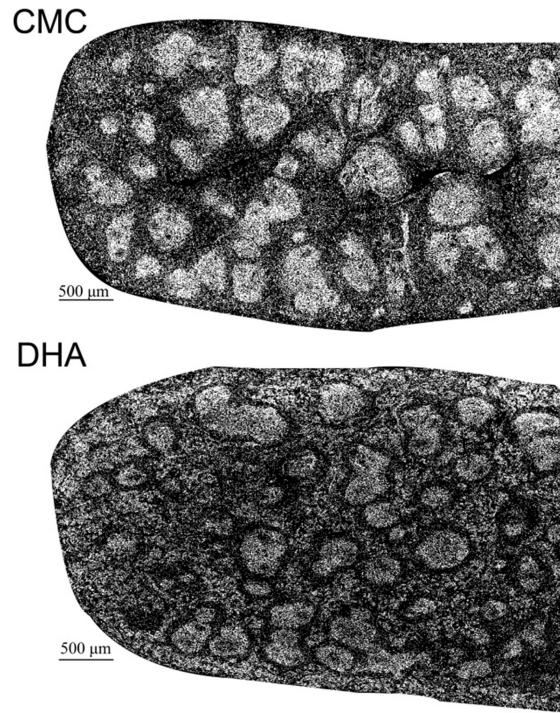

**Supplementary Figure 3.** Representative images of FFPE spleen sections from DHA-treated group and CMC control.

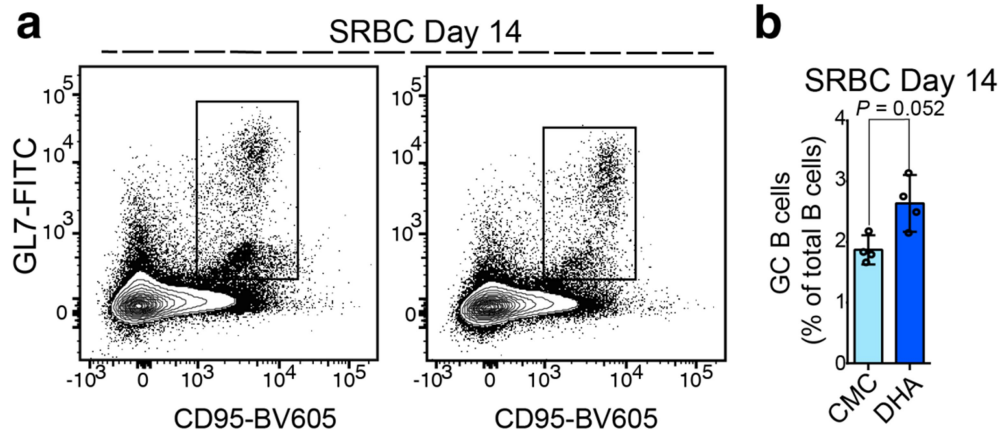

**Supplementary Figure 4.** (a) Representative flow cytometry plots of germinal center B cells ( $B220^+CD95^+GL7^+$ ) post SRBC-immunization are shown. (b) Bar graphs represent slight and non-significant increase in percentages of germinal center B cells in DHA-treated group compared to CMC-treated group post immunized with sheep red blood cells 14 days ( $n=4$ , two-tailed Student t-test). The error bars indicate standard error.

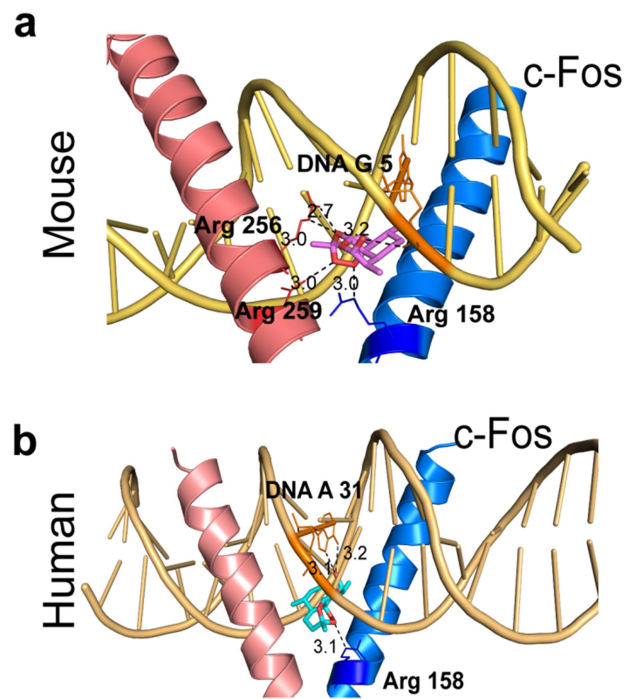

**Supplementary Figure 5.** Molecular docking simulations of DHA–c-Fos interactions.

The docking simulation suggested that DHA could bind to both murine (a) and human (b) c-Fos close to the basic DNA binding region.

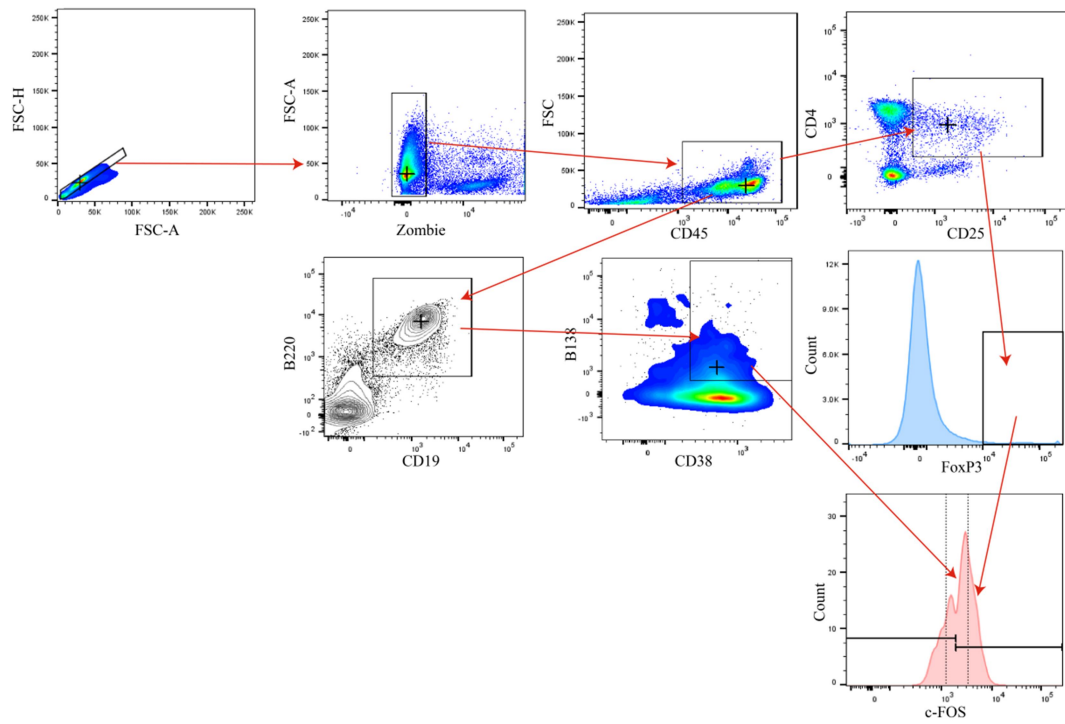

**Supplementary Figure 6.** Gating strategies for the detection of c-Fos. The c-Fos median fluorescence intensity (MFI) was determined by gating on Treg and plasma cells.

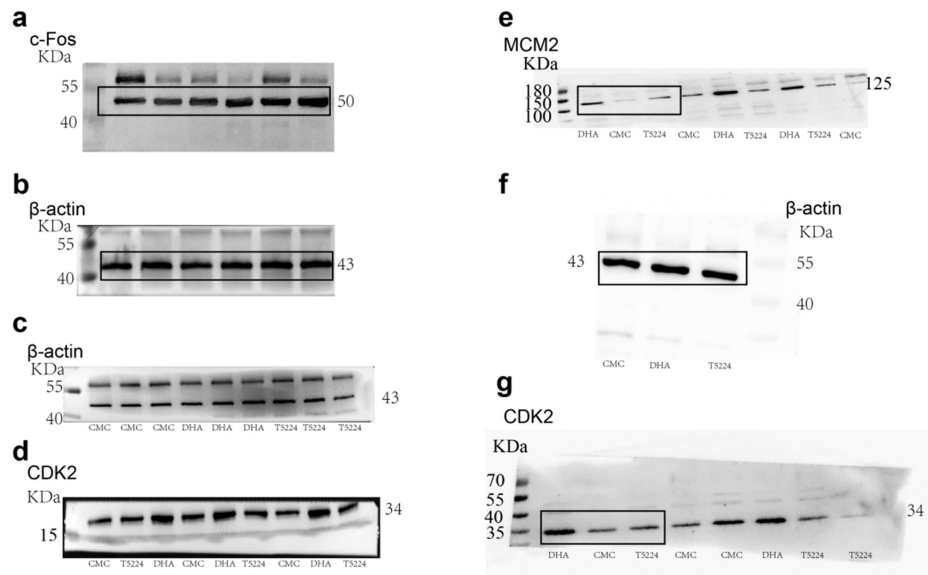

**Supplementary Figure 7:** Uncropped western blots correspond to Figure 6a (a and b) and Figure 6d (c-g). For c , d , the western blot experiment was repeated independently for three times with similar results.

**Supplementary Data 1** Differential gene expression analysis of  $T_{reg}$  in DHA treatment compared with CMC control.

**Supplementary Data 2** Differential gene expression analysis of plasma cells in DHA treatment compared with CMC control.

**Supplementary Data 3** Source data of manuscript.
