# Supplementary material for: Dihydroartemisinin imposes positive and negative regulation on Treg and plasma cells via direct interaction and activation of c-Fos
Source: PubMed Central journal article supplement (PMC9842609; doi:10.1038/s42003-023-04454-5), 2023-01-16
Supplement: 42003_2023_4454_MOESM3_ESM.pdf [file 42003_2023_4454_MOESM3_ESM.pdf]

## Description of Additional Supplementary Files

**File name:** Supplementary Data 1

**Description:** Differential gene expression analysis of Treg in DHA treatment compared with CMC control.

**File name:** Supplementary Data 2

**Description:** Differential gene expression analysis of plasma cells in DHA treatment compared with CMC control.

**File name:** Supplementary Data 3

**Description:** Source data of manuscript.
